# Supplementary material for: Acanthopanax senticosus Harms extract causes G0/G1 cell cycle arrest and autophagy via inhibition of Rubicon in human liver cancer cells
Source: PubMed Central journal article supplement — Oncol Rep. 2021 Jan 22;45(3):1193–201. doi: 10.3892/or.2021.7948 (PMC7859978; doi:10.3892/or.2021.7948), 2021-01-22

Figure S1. Quantitative analysis of transmission electron microscopy of autophagy-related structures in ASHE-treated HuH-7 cells from Fig. 4. (A) Number and (B) percentage of autophagic structures (autophagosomes and autolysosomes) in ASHE-treated HuH-7 cells. A total of seven randomly selected cells were examined. Data are presented as the mean  $\pm$  standard deviation. \* $P < 0.05$  vs. untreated cells. ASHE, *Acanthopanax senticosus* Harms root extract.

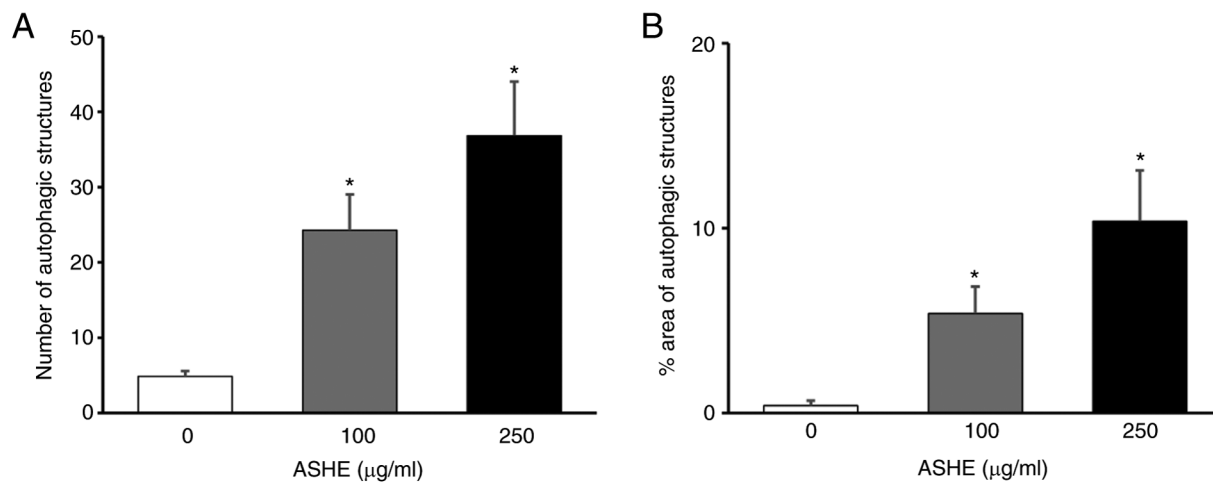

Figure S2. Rubicon protein expression in HuH-7 and HepG2 cells treated with ASHE in the presence of CQ or bafilomycin A1. HuH-7 and HepG2 cells were co-treated with ASHE and (A) CQ (HuH7, 0.5  $\mu$ M; HepG2, 2  $\mu$ M) for 72 h or (B) bafilomycin A1 (HuH7, 50 nM; HepG2, 125 nM) for 2 h. Protein expression was detected by western blotting. Actin was used as the loading control. ASHE, *Acanthopanax senticosus* Harms root extract; CQ, chloroquine; Rubicon, run domain Beclin-1-interacting and cysteine-rich domain-containing.

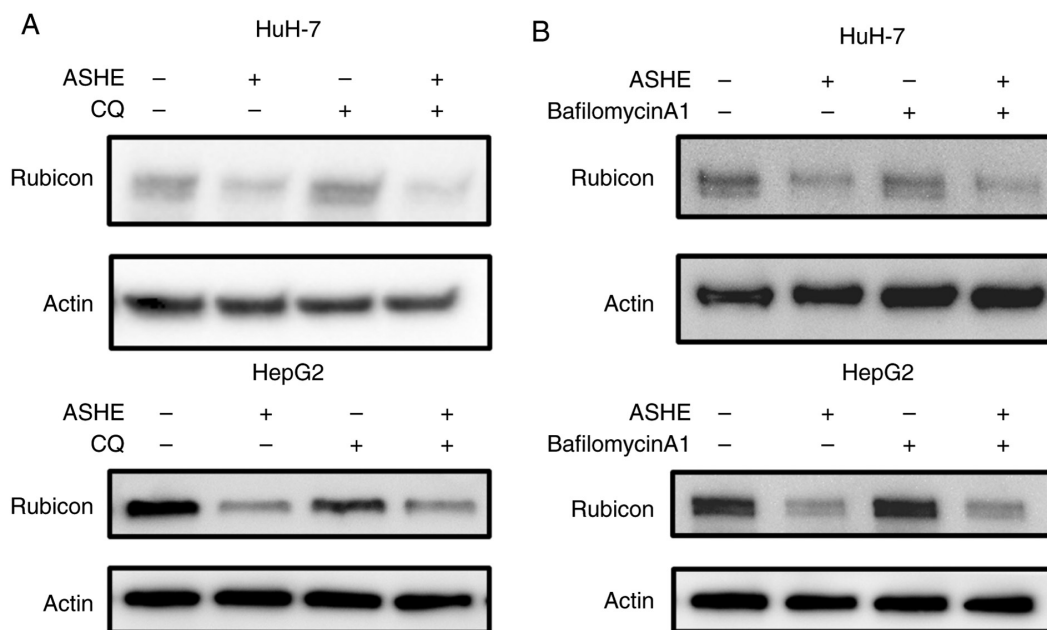

Figure S3. Rubicon mRNA expression in HuH-7 and HepG2 cells was examined using reverse transcription-quantitative PCR. The Y-axis indicates fold change of *RUBCN* expression in HuH-7 and HepG2 cells treated with ASHE for the indicated time periods relative to that in the untreated cells. Relative expression of *RUBCN* was normalized to that of  $\beta$ -actin. Data are presented as the mean  $\pm$  standard deviation of three independent experiments. ASHE, *Acanthopanax senticosus* Harms root extract; Rubicon, run domain Beclin-1-interacting and cysteine-rich domain-containing.

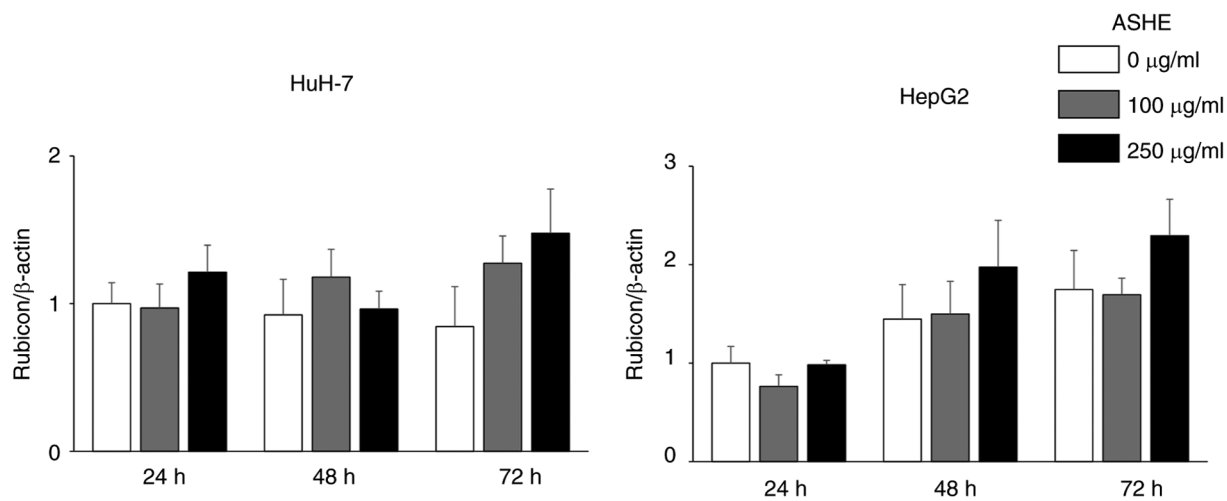

Supplement: Supplementary_Data.pdf [file Supplementary_Data.pdf]
